# Supplementary material for: Highly efficient synthesis of alkylidene cyclic carbonates from low concentration CO2 using hydroxyl and azolate dual functionalized ionic liquids
Source: Royal Society of Chemistry journal article supplement (doi:10.1039/d0gc03510f), 2020-12-10
Supplement: d0gc03510f1.pdf [file d0gc03510f1.pdf]

## Electronic Supplementary Information

### **Highly Efficient Synthesis of Alkylidene Cyclic Carbonates from Low Concentration CO<sub>2</sub> using Hydroxyl and Azolate Dual Functionalized Ionic Liquids**

Guiling Shi,<sup>†</sup> Ran Zhai,<sup>†</sup> Haoran Li,<sup>†</sup> and Congmin Wang<sup>\*,†</sup>

<sup>†</sup>Department of Chemistry, State Key Laboratory of Chemical Engineering, Zhejiang University, Hangzhou  
310027, China.

E-mail: [chewcm@zju.edu.cn](mailto:chewcm@zju.edu.cn)

## NMR data of ILs

**[Ch][BenIm]:**  $^1\text{H}$  NMR (400 MHz, DMSO)  $\delta$  7.77 (s, 1H), 7.38 (dd, 2H), 6.81 (dd, 2H), 3.90 (m, 2H), 3.38 (m, 2H), 3.09 (s, 9H).  $^{13}\text{C}$  NMR (101 MHz, DMSO)  $\delta$  150.61, 144.98, 117.29, 115.75, 67.35, 67.33, 67.30, 54.79, 53.25, 53.21, 53.17.

**[Ch][Im]:**  $^1\text{H}$  NMR (400 MHz, DMSO)  $\delta$  7.19 (s, 1H), 6.73 (2H), 3.84 (m, 2H), 3.35 (m, 2H), 3.09 (s, 9H).  $^{13}\text{C}$ NMR (101 MHz, DMSO)  $\delta$  141.28, 124.19, 67.50, 67.47, 67.44, 54.72, 53.23, 53.19, 53.16.

**[Ch][Tetz]:**  $^1\text{H}$  NMR (400 MHz, DMSO)  $\delta$  8.21 (s, 1H), 3.85 (m, 2H), 3.46 – 3.37 (m, 2H), 3.11 (s, 9H).  $^{13}\text{C}$ NMR (101 MHz, DMSO)  $\delta$  148.16, 67.08, 67.05, 67.02, 55.21, 53.26, 53.23, 53.19.

**[Ch][Triz]:**  $^1\text{H}$  NMR (400 MHz, DMSO)  $\delta$  7.74 (s, 2H), 3.87 (m, 2H), 3.45 – 3.40 (m, 2H), 3.12 (s, 9H).  $^{13}\text{C}$ NMR (101 MHz, DMSO)  $\delta$  148.81, 67.35, 67.32, 67.29, 54.97, 53.26, 53.22, 53.18

**[N<sub>1111</sub>][Triz]:**  $^1\text{H}$  NMR (400 MHz, DMSO)  $\delta$  7.61 (s, 2H), 3.09 (s, 12H).  $^{13}\text{C}$  NMR (101 MHz, DMSO)  $\delta$  149.20, 54.37, 54.33, 54.30

**[N<sub>2222</sub>][Triz]:**  $^1\text{H}$  NMR(400 MHz, DMSO)  $\delta$  7.53 (s, 1H), 3.20 (q,  $J = 7.3$  Hz, 8H), 1.20 – 1.06 (m, 12H).  $^{13}\text{C}$  NMR (101 MHz, DMSO)  $\delta$  148.98, 51.36, 51.33, 51.30, 7.04.

**[N<sub>4444</sub>][Triz]:**  $^1\text{H}$  NMR (400 MHz, DMSO)  $\delta$  7.58 (s, 2H), 3.22 – 3.11 (m, 8H), 1.62 – 1.49 (m, 8H), 1.36 – 1.24 (m, 8H), 0.93 (t,  $J = 7.3$  Hz, 12H).  $^{13}\text{C}$ NMR (101 MHz, DMSO)  $\delta$  148.98, 57.60, 23.16, 19.30, 13.59.

**[P<sub>66614</sub>][Triz]:**  $^1\text{H}$  NMR (400 MHz, DMSO)  $\delta$  7.64 (s, 2H), 2.26 – 2.09 (m, 8H), 1.47 – 1.21 (m, 47H), 0.91 – 0.82 (m, 13H).  $^{13}\text{C}$ NMR (101 MHz, DMSO)  $\delta$  148.62, 31.28, 30.80, 30.38, 30.01, 29.86, 29.80, 29.65, 29.05, 29.03, 29.01, 28.99, 28.94, 28.70, 28.62, 28.06, 22.07, 21.90, 21.79, 20.52, 20.48, 20.41, 17.66, 17.57, 17.19, 17.10, 13.91, 13.82

**Table S1.** The effect of various metal catalysts<sup>[a]</sup> on this reaction.

| Entry            | Metal salt                        | Yield(%) <sup>[b]</sup> |
|------------------|-----------------------------------|-------------------------|
| 1                | AgNO <sub>3</sub>                 | 93                      |
| 2                | AgOAc                             | 91                      |
| 3                | AgCO <sub>3</sub>                 | 48                      |
| 4 <sup>[c]</sup> | Ag <sub>2</sub> O                 | 78                      |
| 5                | Fe(NO <sub>3</sub> ) <sub>3</sub> | 4                       |
| 6                | Cu(NO <sub>3</sub> ) <sub>2</sub> | 1                       |
| 7                | Al(NO <sub>3</sub> ) <sub>3</sub> | 3                       |

<sup>[a]</sup>Reaction conditions: **1a** (4 mmol), metal salt (0.4 mmol), [Ch][Tri] (0.8 mmol) and CO<sub>2</sub> (1 bar) for 24 h at 30 °C). <sup>[b]</sup> Determined by GC using internal standard method. <sup>[c]</sup> 0.2 mmol Ag<sub>2</sub>O was used.

**Table S2.** The effect of the temperature, time and the amount of the catalyst on the synthesis of alkylidene carbonates from CO<sub>2</sub>.<sup>[a]</sup>

| Entry | AgNO <sub>3</sub> [%] | [Ch][Tri][%] | T [°C] | Time [h] | Yield [%] <sup>[b]</sup> |
|-------|-----------------------|--------------|--------|----------|--------------------------|
| 1     | 10                    | 20           | 30     | 6        | 49                       |
| 2     | 10                    | 20           | 30     | 12       | 78                       |
| 3     | 10                    | 20           | 30     | 24       | 93                       |
| 4     | 10                    | 20           | 30     | 36       | 92                       |
| 5     | 10                    | 20           | 20     | 24       | 77                       |
| 6     | 10                    | 20           | 40     | 24       | 83                       |
| 7     | 1                     | 20           | 30     | 24       | 26                       |
| 8     | 10                    | 15           | 30     | 24       | 71                       |
| 9     | 10                    | 20           | 30     | 24       | 90                       |

[a] Reaction conditions: **1a** (4 mmol), AgNO<sub>3</sub>, [Ch][Tri] and CO<sub>2</sub> (1 bar).

[b] Determined by GC using internal standard method.

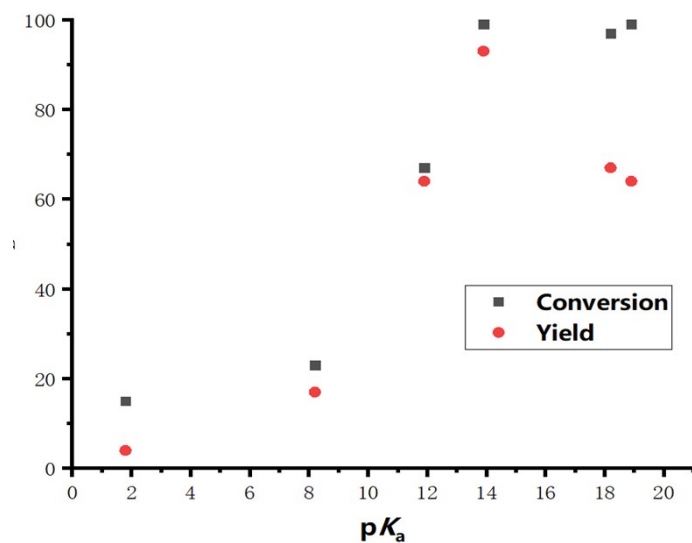

**Fig. S1** The relationship between the conversion and the yield with the calculated  $pK_a$  value

**Table S3** The CO<sub>2</sub> absorption capacity by anion-functionalized ILs<sup>[a]</sup>

| Entry | Ionic liquid | Calculated $pK_a$ | absorption capacity <sup>[b]</sup> |
|-------|--------------|-------------------|------------------------------------|
| 1     | [Ch][Cl]     | 1.8               | 0.04                               |
| 2     | [Ch][Tetz]   | 8.2               | 0.08                               |
| 3     | [Ch][BenTri] | 11.9              | 0.27                               |
| 4     | [Ch][Tri]    | 13.9              | 0.87                               |
| 5     | [Ch][BenIm]  | 18.2              | 0.89                               |
| 6     | [Ch][Im]     | 18.9              | 0.93                               |

[a] The absorption was carried out at 30°C. [b] Mol CO<sub>2</sub> per mol IL

**Table S4** The synthesis of alkylidene carbonates using AgNO<sub>3</sub> as catalyst

| entry | Base/Ligand                                                   | P(MPa) | T(°C) | Yield(%) | Ref       |
|-------|---------------------------------------------------------------|--------|-------|----------|-----------|
| 1     | [Ch][Tri]                                                     | 0.1    | 30    | 93       | This work |
| 2     | [Ch][Tri]                                                     | 0.01   | 30    | 85       | This work |
| 3     | [Ch][Tri]                                                     | 0.015  | 30    | 87       | This work |
| 4     | [P <sub>66614</sub> ][Tri]                                    | 0.1    | 30    | 73       | 1         |
| 5     | Ph <sub>3</sub> P                                             | 0.1    | 25    | 0        | 2         |
| 6     | Ph <sub>3</sub> P                                             | 0.1    | 25    | 0        | 3         |
| 7     | ( <i>n</i> -C <sub>7</sub> H <sub>15</sub> ) <sub>4</sub> NBr | 0.1    | 60    | 0        | 4         |
| 9     | EMImOAc                                                       | 0.1    | 45    | 58       | 5         |
| 10    | DavePhos                                                      | 0.8    | 25    | 20       | 6         |

1. K. H. Chen, G. L. Shi, R. N. Dao, K. Mei, X. Y. Zhou, H. R. Li and C. M. Wang, *Chem Commun*, 2016, **52**, 7830-7833.
2. Q.W. Song, B. Yu, X. D. Li, R. Ma, Z. F. Diao, R. G. Li, W. Li and L. N. He, *GreenChem.*, 2014, **16**, 1633-1638.
3. Q. W. Song, W.Q. Chen, R. Ma, A. Yu, Q. Y. Li, Y. Chang and L. N. He, *ChemSusChem*, 2015, **8**, 821-827.
4. Q. W. Song and L. N. He, *Adv. Synth.Catal.*, 2016, **358**, 1251-1258.
5. Y. Yuan, Y. Xie, C. Zeng, D.D. Song, S. Chaemchuen, C. Chen, F. Verpoort, *Green Chem.*, 2017, **19**, 2936-2940.
6. S.Dabral, B.Bayarmagnai, M.Hermsen, J.Schiessl, V.Mormul, A. S. K.Hashmi, T.Schaub, *Org Lett* 2019, **5**, 1422-1425.
